# Supplementary material for: Covalent and non-covalent interactions of cyanidin-3-O-glucoside with milk proteins revealed modifications in protein conformational structures, digestibility, and allergenic characteristics
Source: Royal Society of Chemistry journal article supplement (doi:10.1039/d1fo01946e), 2021-01-01

**Supplementary Table S1** Information of the milk-allergic human sera samples

| Serum No. | Age & gender | milk-specific IgE (kU/L) * |
|-----------|--------------|----------------------------|
| PL 21527  | 27 (NA)      | 403.9                      |
| PL 21902  | 32 (M)       | 43.6                       |
| PL 25830  | 66 (F)       | 92.9                       |
| PL 25880  | 24 (M)       | 78.7                       |
| PL 26248  | 28 (F)       | 20.8                       |
| PL 26024  | 24 (M)       | ≥100                       |
| PL 23320  | 30 (M)       | 91.0                       |
| PL 25329  | 66 (F)       | ≥100                       |
| PL 20838  | 31 (M)       | 30.5                       |
| PL 26655  | 33 (M)       | 50.3                       |

NA, not available.

\*Tested by the ImmunoCap® FEIA system against the cow milk allergen.

**Supplementary Table S2** PDI values of  $\alpha$ -CN–C3G and  $\beta$ -LG–C3G non-covalent and covalent complexes.

|              | C3G/protein molar | Pdl                |                    |
|--------------|-------------------|--------------------|--------------------|
|              | ratio             | Non-covalent       | Covalent           |
| $\alpha$ -CN | 0                 | 0.46a $\pm$ 0.08   | 0.52a $\pm$ 0.14   |
|              | 10                | 0.46a $\pm$ 0.09   | 0.53a $\pm$ 0.13   |
|              | 20                | 0.49a $\pm$ 0.05   | 0.44a $\pm$ 0.02   |
|              | 30                | 0.43a $\pm$ 0.06   | 0.47a $\pm$ 0.15   |
|              | 40                | 0.41a $\pm$ 0.06   | 0.52a $\pm$ 0.06   |
|              | 50                | 0.43a $\pm$ 0.07   | 0.42a $\pm$ 0.05   |
| $\beta$ -LG  | 0                 | 0.45abc $\pm$ 0.05 | 0.44abc $\pm$ 0.01 |
|              | 10                | 0.38bc $\pm$ 0.08  | 0.41abc $\pm$ 0.05 |
|              | 20                | 0.45abc $\pm$ 0.05 | 0.53ab $\pm$ 0.03  |
|              | 30                | 0.52ab $\pm$ 0.01  | 0.49abc $\pm$ 0.04 |
|              | 40                | 0.43abc $\pm$ 0.07 | 0.43abc $\pm$ 0.02 |
|              | 50                | 0.55a $\pm$ 0.04   | 0.36c $\pm$ 0.06   |

$\alpha$ -CN,  $\alpha$ -casein;  $\beta$ -LG,  $\beta$ -lactoglobulin; C3G, cyanidin-3-*O*-glucoside;

Significance analysis was performed for each protein under both complexation conditions. Values are expressed as the mean  $\pm$  SD and different superscript letters in the same group indicate significant difference ( $p < 0.05$ , Tukey's test).

**Supplementary Figure S1** Stern-Volmer plots for the quenching of (A)  $\alpha$ -CN and (B)  $\beta$ -LG by C3G at different temperatures (298 and 310 K).

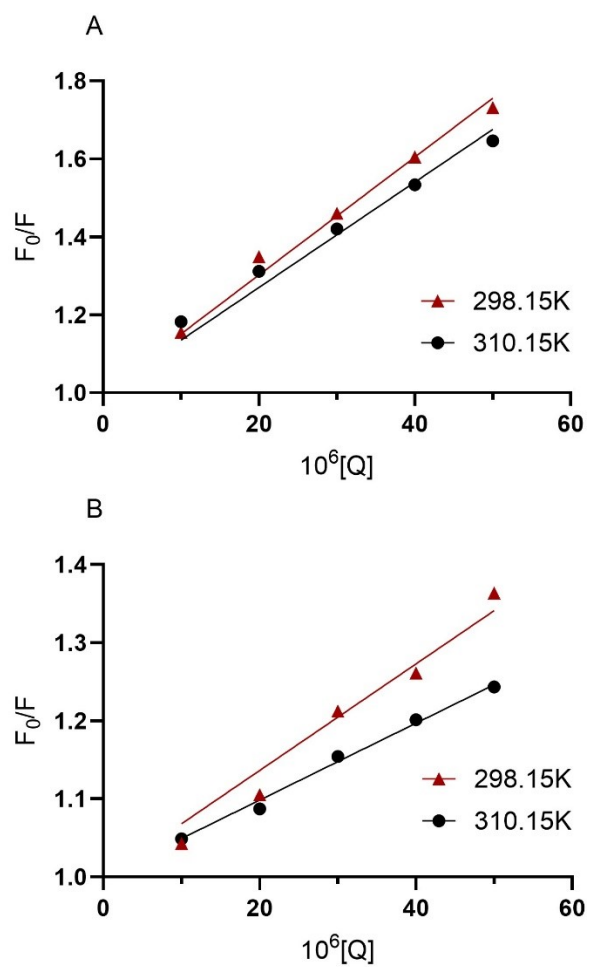

**Supplementary Figure S2** Calculated secondary structural composition of  $\alpha$ -CN (A) and  $\beta$ -LG (B) non-covalently and covalently interacted with C3G.  $\alpha$ -CN,  $\alpha$ -casein;  $\beta$ -LG,  $\beta$ -lactoglobulin; C3G, cyanidin-3-*O*-glucoside.

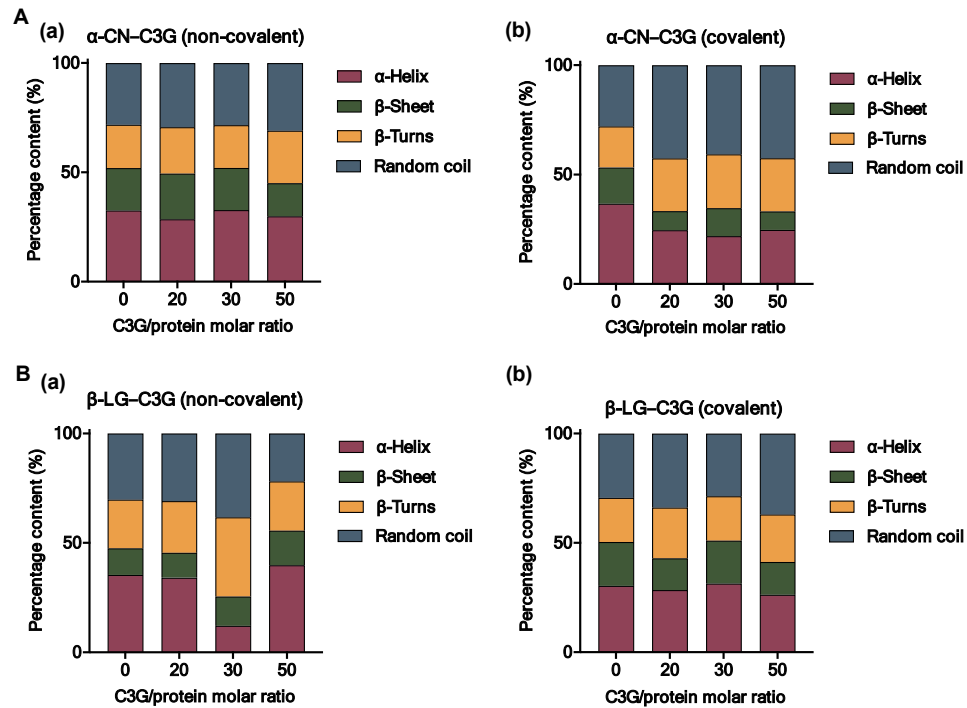

**Supplementary Figure S3** Pearson correlation analysis revealed the transition between certain ordered secondary components and random coil in  $\alpha$ -CN/ $\beta$ -LG-C3G complexes. (A) random coil vs.  $\alpha$ -helix; (B) random coil vs.  $\beta$ -sheet; (C) random coil vs.  $\beta$ -turn.

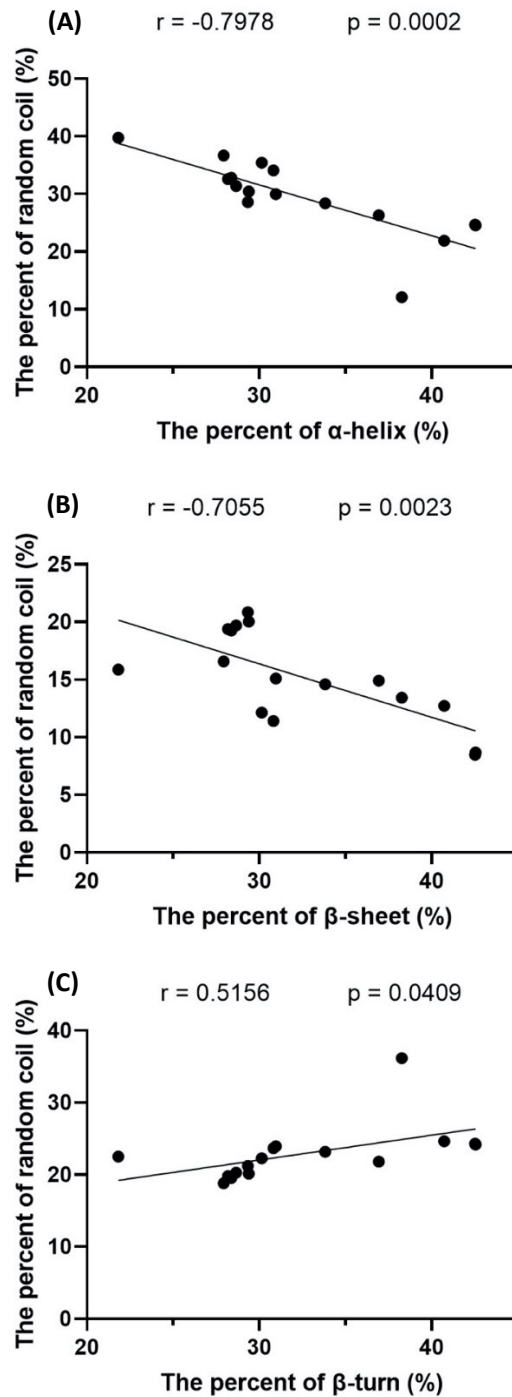

Supplement: d1fo01946e1.pdf [file d1fo01946e1.pdf]
